# Supplementary material
Source: PubMed Central journal article supplement (PMC7238378)
Supplement: JCB908523_Supplemental_Material.pdf [file JCB908523_Supplemental_Material.pdf]

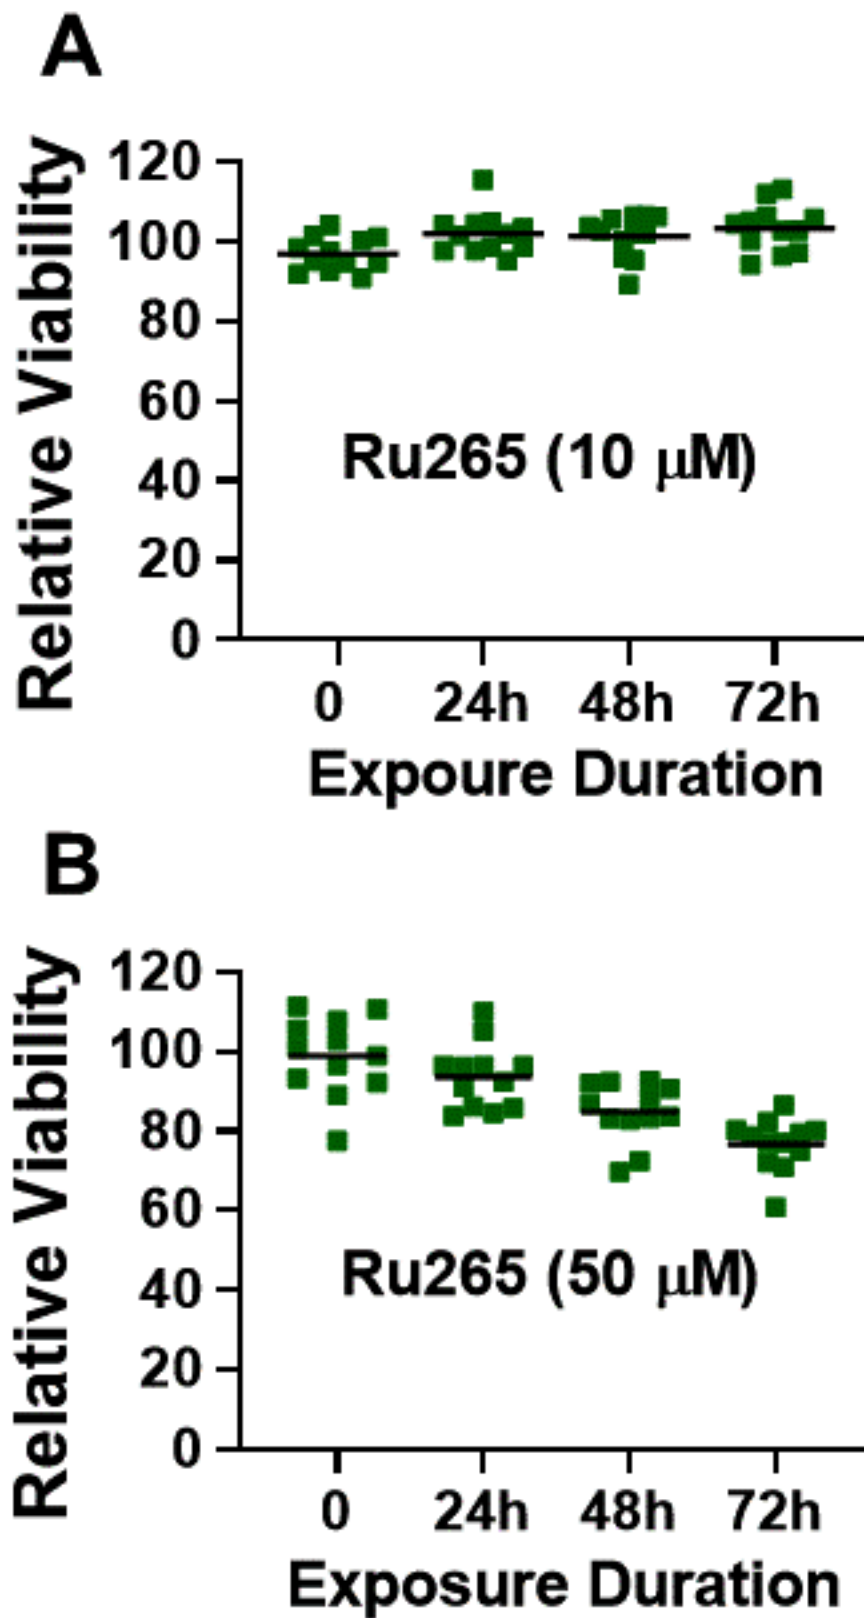

Suppl Fig 1 Cell viability of cortical neuron cultures treated with Ru265 (10 or 50  $\mu$ M) for 0, 24, 48 or 72 hr (A and B). Each point represents relative cell viability for single well of a 48 well culture plate. Results are representative of 3 separate experiments (n=3).
